# Supplementary material for: Are Land Use Options in Viticulture and Oliviculture in Agreement with Bioclimatic Shifts in Portugal?
Source: MDPI journal article supplement (doi:10.3390/land10080869), 2021-08-19
Supplement: s1 [file s1]

# Supplementary material

Article

## Are land use options in viticulture and oliviculture in agreement with bioclimatic shifts in Portugal?

Cristina Andrade <sup>1,2,\*</sup>, André Fonseca <sup>2,3</sup> and João A. Santos <sup>2,3,4</sup>

<sup>1</sup> Natural Hazards Research Center (NHRC.ipt), Instituto Politécnico de Tomar, Quinta do Contador, Estrada da Serra, 2300-313 Tomar, Portugal

<sup>2</sup> Centre for the Research and Technology of Agro-Environmental and Biological Sciences, CITAB, Universidade de Trás-os-Montes e Alto Douro, UTAD, 5001-801 Vila Real, Portugal

<sup>3</sup> Institute for Innovation, Capacity Building and Sustainability of Agri-food Production, Inov4Agro

<sup>4</sup> Department of Physics, School of Sciences and Technology, Universidade de Trás-os-Montes e Alto Douro, UTAD, 5001-801 Vila Real, Portugal

\* Correspondence: c.andrade@ipt.pt; Tel.: +351 249 328 100

**Abstract:** The climatic system is intertwined with land use and land cover. Therefore, climate extremes are stress factors contributing to land degradation and, eventually, to desertification. In this study, high-resolution observational gridded datasets are used to assess modifications in the Köppen-Geiger and the Worldwide Bioclimatic (WBCS) Classification Systems, between 1950–1979 and 1990–2019 in mainland Portugal. From the WBCS, a compound Bioclimatic-Shift Exposure Index (BSEI) is attained to identify the most exposed regions to changing climates. The temporal evolution of land use/cover for vineyards and olive groves between 1990 and 2018, as well as correlations with areas with bioclimatic shifts, are analyzed. The results show an increase (decrease) of the area of CSa Warm Mediterranean climate with hot summer (CSb, warm summer) of 18.1% (–17.8%) for 1990–2019 when compared to 1950–1979, with CSa extending northwards. The WBCS Temperate areas also shift northwards, with a decrease of –5.11%. The arid and semi-arid ombrotypes areas increased towards the north, to the detriment of the humid to sub-humid ombrotypes. Similar results were obtained for the thermotypic horizons. Overall, the BSEI showed significant changes in northwestern Portugal which are the most exposed to bioclimatic shifts. Vineyards have been displaced towards regions that are either the most cooler and humid, in the northwest (Vinho Verde wine region), or warmest and driest, in the south (Alentejo wine region). For oliviculture, the general trend for a shift towards cooler and more humid areas, suggest an attempt of the sector to adapt to the ongoing climate change, despite an areal growth in southernmost regions. As vineyards and olive groves in southern Portugal are commonly irrigated, instead of the rainfed conditions, thus, options for the intensification of these crops in this region may threaten the already scarce water resources and challenge the future sustainability of these sectors.

**Keywords:** Köppen-Geiger climate classification; Worldwide Bioclimatic Classification System (WBCS); Bioclimates; Thermotypes; Ombrotypes; Vineyards; Olive groves; Portugal

**Table S1.** Criteria to calculate the Köppen-Geiger classification for the main climates and subsequent precipitation conditions for the first two letters. For the polar climates (E) no precipitation differentiations are given, only temperature conditions are defined, consequently, the polar climates (E) must be determined first, followed by the arid climates (B) and subsequent differentiation into the equatorial climates (A) and the warm temperate and snow climates (C) and (D), respectively [1].

| Climate<br>(Main group)                                                                                 | Description                                                   | Criterion                                                                       |
|---------------------------------------------------------------------------------------------------------|---------------------------------------------------------------|---------------------------------------------------------------------------------|
| <b>A – Tropical or Equatorial</b><br>$T_{\min} \geq +18\text{ }^{\circ}\text{C}$                        | <b>Af</b> – Tropical rainforest, fully humid                  | $P_{\min} \geq 60\text{ mm}$                                                    |
|                                                                                                         | <b>Am</b> – Tropical monsoon                                  | $P_a \geq 25(100 - P_{\min})$                                                   |
|                                                                                                         | <b>As</b> – Equatorial savannah with dry summer               | $P_{\min} < 60\text{ mm}$ in summer                                             |
|                                                                                                         | <b>Aw</b> – Equatorial savannah with dry winter               | $P_{\min} < 60\text{ mm}$ in winter                                             |
| <b>B – Dry or Arid</b><br>$P_a < 10 P^{\text{th}}$                                                      | <b>BW</b> – Desert                                            | $P_a > 5 P^{\text{th}}$                                                         |
|                                                                                                         | <b>BS</b> – Semi-arid or steppe                               | $P_a \leq 5 P^{\text{th}}$                                                      |
| <b>C – Temperate or Warm temperate</b><br>$-3^{\circ}\text{C} < T_{\min} < +18\text{ }^{\circ}\text{C}$ | <b>CS</b> – Warm temperate (or Mediterranean) with dry summer | $P_{\min} < P_{w\min}$ , $P_{w\max} > 3 P_{\min}$ and $P_{\min} < 40\text{ mm}$ |
|                                                                                                         | <b>CW</b> – Warm temperate (or Mediterranean) with dry winter | $P_{w\min} < P_{\min}$ and $P_{\max} > 10 P_{w\min}$                            |
|                                                                                                         | <b>Cf</b> – Warm temperate (or Mediterranean) fully humid     | neither CS nor CW                                                               |
|                                                                                                         |                                                               |                                                                                 |
| <b>D – Continental or Cold</b><br>$T_{\min} \leq -3\text{ }^{\circ}\text{C}$                            | <b>DS</b> – Continental with dry summer                       | $P_{\min} < P_{w\min}$ , $P_{w\max} > 3 P_{\min}$ and $P_{\min} < 40\text{ mm}$ |
|                                                                                                         | <b>DW</b> – Continental with dry winter                       | $P_{w\min} < P_{\min}$ and $P_{\max} > 10 P_{w\min}$                            |
|                                                                                                         | <b>Df</b> – Continental, fully humid                          | neither DS nor DW                                                               |
| <b>E – Polar</b><br>$T_{\max} < +10\text{ }^{\circ}\text{C}$                                            | <b>ET</b> – Tundra                                            | $0\text{ }^{\circ}\text{C} \leq T_{\max} < +10\text{ }^{\circ}\text{C}$         |
|                                                                                                         | <b>EF</b> – Ice cap or frost                                  | $T_{\max} < 0\text{ }^{\circ}\text{C}$                                          |
|                                                                                                         |                                                               |                                                                                 |

<sup>1</sup> In this Table,  $T_{\max}$  is the monthly mean temperature of the warmest month ( $^{\circ}\text{C}$ ),  $T_{\min}$  is the monthly mean temperature of the coldest month ( $^{\circ}\text{C}$ ),  $P_a$  is the accumulated annual precipitation (in mm),  $P_{\min}$  is the precipitation of the driest month (in mm),  $P_{\min}$  and  $P_{\max}$  are the lowest and highest monthly precipitation values for the summer half-years (April to September) in mm,  $P_{w\min}$  and  $P_{w\max}$  are the lowest and highest monthly precipitation values for the winter half-year (October to March) in mm.

**Table S2.** Criteria for the third letter temperature classification (**h** and **k**) for dry climates (B) and (**a** to **d**) for the warm temperate (C) and continental (D) climates following the Köppen's climate classification [1].

| Type description                       | Criterion                                                              |
|----------------------------------------|------------------------------------------------------------------------|
| <b>h</b> – hot steppe or desert        | $T_a \geq +18\text{ }^{\circ}\text{C}$                                 |
| <b>k</b> – Cold steppe or desert       | $T_a < +18\text{ }^{\circ}\text{C}$                                    |
| <b>a</b> – Hot summer                  | $T_{\max} \geq +22\text{ }^{\circ}\text{C}$                            |
| <b>b</b> – Warm summer                 | Not <b>a</b> and at least $4T_{\min} \geq +10\text{ }^{\circ}\text{C}$ |
| <b>c</b> – Cold summer and cold winter | Not <b>b</b> and $T_{\min} > -38\text{ }^{\circ}\text{C}$              |
| <b>d</b> – Extremely continental       | Like <b>c</b> but $T_{\min} \leq -38\text{ }^{\circ}\text{C}$          |

<sup>2</sup> In this Table,  $T_a$  is the annual mean temperature,  $T_{\max}$  and  $T_{\min}$  are the monthly mean temperatures of the warm and coldest months ( $^{\circ}\text{C}$ ), respectively. For **b** type warm summer, a threshold temperature value of  $+10\text{ }^{\circ}\text{C}$  must occur for at least four months.

**Table S3.** Vineyard land cover evolution (in ha) over mainland Portugal, by Wine Region [2].

| Wine Region                           | 1989           | 01/09/2007     | 31/07/2010     | 31/07/2015     | 31/07/2018     | 31/07/2020     |
|---------------------------------------|----------------|----------------|----------------|----------------|----------------|----------------|
| <b>Minho</b>                          | 38 349         | 31 816         | 30 903         | 20 433         | 21 973         | <b>24 240</b>  |
| <b>Trás-os-Montes / Douro e Porto</b> | 76 695         | 68 899         | 68 893         | 59 972         | 56 094         | 55 775         |
| <i>Trás-os-Montes</i>                 | ---            | ---            | ---            | 17 788         | 13 539         | 11 613         |
| <i>Douro e Porto</i>                  | ---            | ---            | ---            | 42 184         | 42 556         | <b>44 162</b>  |
| <b>Beiras</b>                         | 56 637         | 57 321         | 56 242         | 53 100         | 46 401         | 42 821         |
| <i>Terras de Cister</i>               | ---            | ---            | ---            | ---            | 2 184          | <b>2 272</b>   |
| <i>Beira Atlântico</i>                | ---            | ---            | ---            | ---            | 14 630         | 13 314         |
| <i>Terras da Beira</i>                | ---            | ---            | ---            | ---            | 15 110         | 13 914         |
| <i>Terras do Dão</i>                  | ---            | ---            | ---            | ---            | 14 476         | 13 321         |
| <b>Tejo</b>                           | 28 124         | 19 518         | 18 082         | 13 589         | 11 944         | 12 751         |
| <b>Lisboa</b>                         | 46 046         | 25 198         | 24 527         | 20 359         | 17 989         | 19 639         |
| <b>Península de Setúbal</b>           | 11 396         | 9 282          | 9 182          | 7 556          | 7 265          | 7 986          |
| <b>Alentejo</b>                       | 11 510         | 23 491         | 23 785         | 21 816         | 24 544         | <b>25 057</b>  |
| <b>Algarve</b>                        | 2 750          | 2 063          | 1 985          | 1 858          | 1 352          | 1 400          |
| <b>Mainland Portugal totals (ha)</b>  | <b>271 507</b> | <b>237 588</b> | <b>233 597</b> | <b>198 683</b> | <b>187 562</b> | <b>189 668</b> |

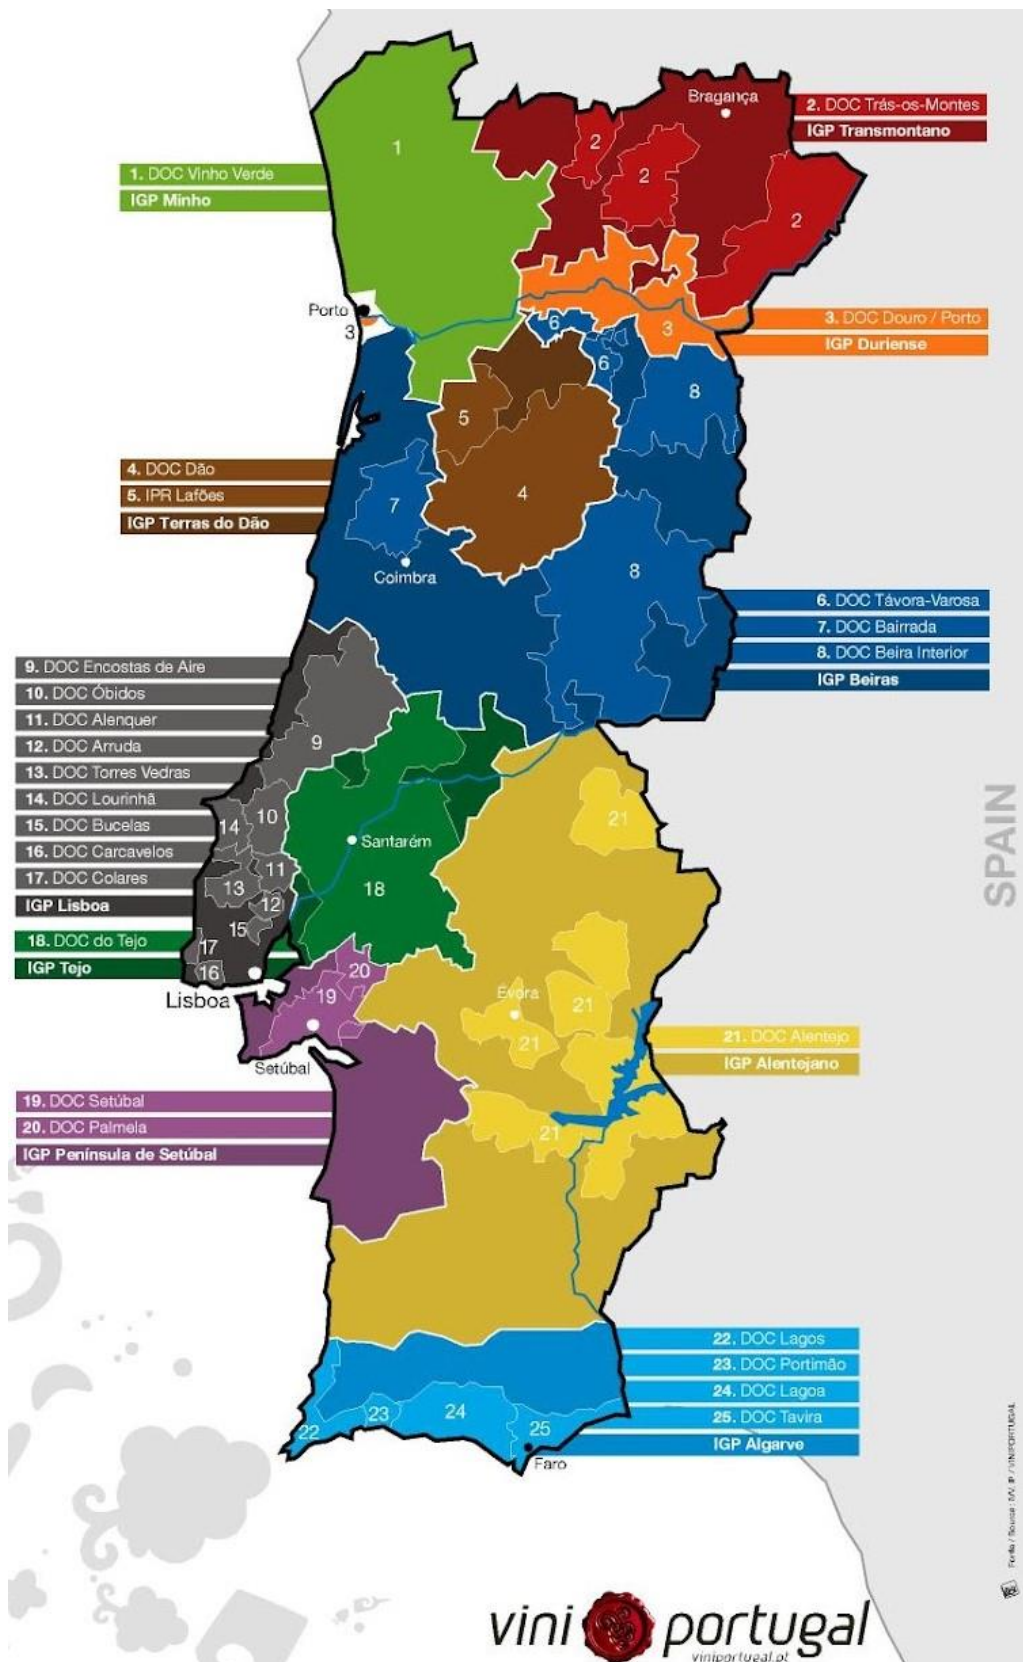

**Figure S1.** Viticulture regions (IGP or VR) in mainland Portugal with the associated Control origin denomination (DOC) (Map adapted from <http://www.vinhoedelicias.com.br/2012/08/mapas-de-vinhos-portugal-geral-e-douro.html> accessed on 09 July 2021, [3]).

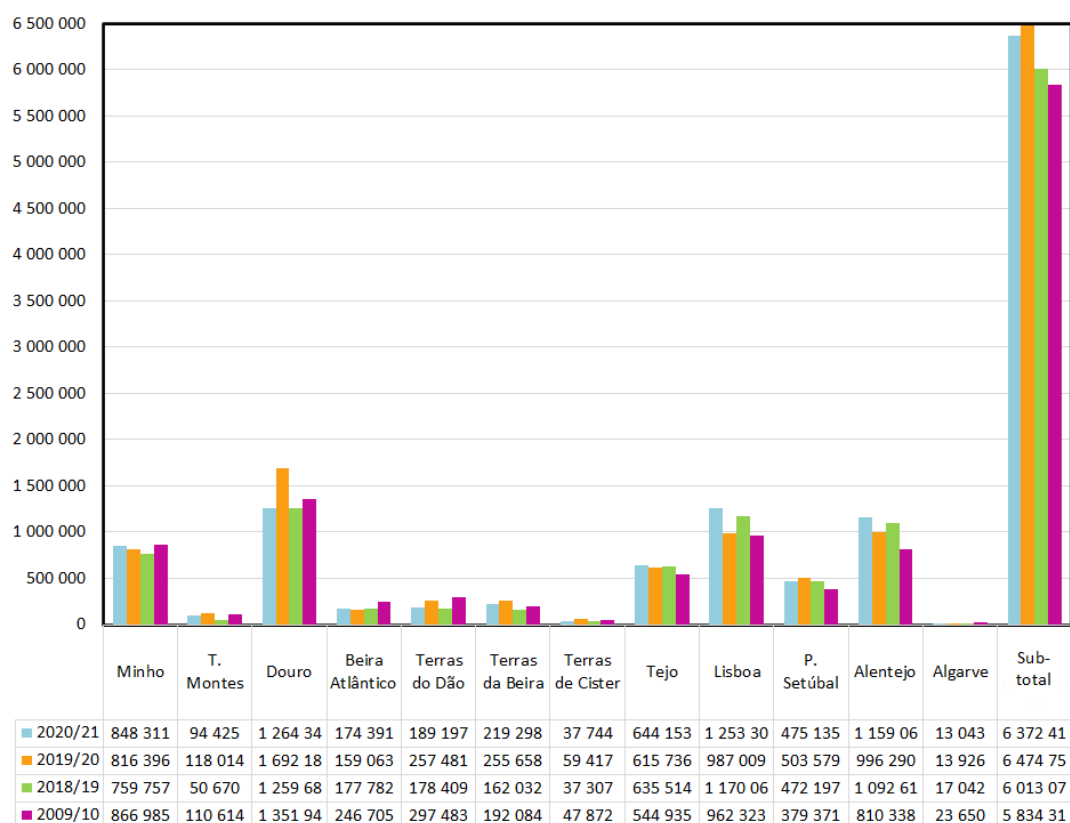

**Figure S2.** Evolution of the total wine production (in hl) by viticulture region and subtotal for mainland Portugal for 2009, 2018/19, 2019/20, and 2020/21 (Data retrieved from [2]).

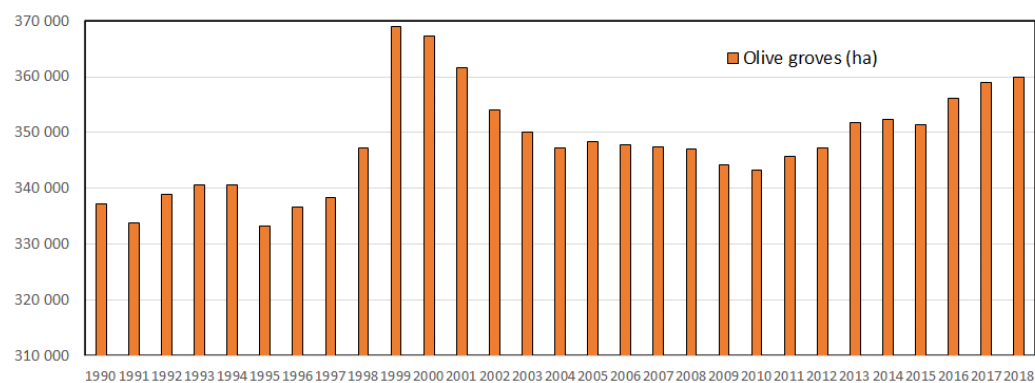

**Figure S3.** Evolution of the total olive grove areas (in ha) for mainland Portugal between 1990 and 2018 (Data retrieved from PORDATA - Ambiente de Consulta, accessed on [4]).

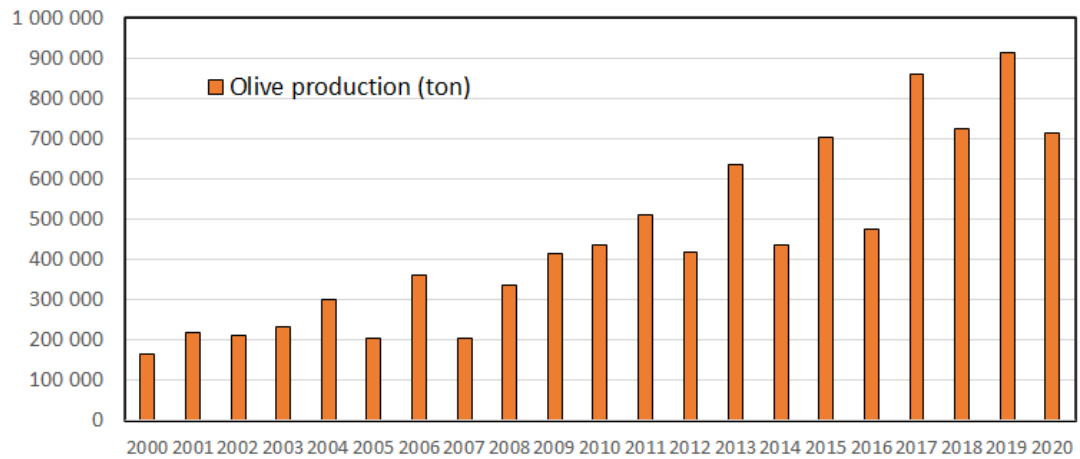

**Figure S4.** Evolution of the total olive production (in ton) for mainland Portugal between 2000 and 2020 (Data retrieved from PORDATA - Ambiente de Consulta, accessed on [4]).

## References

1. Andrade, C.; Contente, J. Köppen's climate classification projections for the Iberian Peninsula. *Clim. Res.* **2020**, *81*, 71–89. <https://doi.org/10.3354/cr01604>.
2. Instituto do Vinho e da Vinha (Wine and Vineyards Institute) **2021**. Available online <https://www.ivv.gov.pt/np4/home.html> accessed on 09 July 2021.
3. Available online <http://www.vinhoedelicias.com.br/2012/08/mapas-de-vinhos-portugal-geral-e-douro.html> accessed on 09 July 2021.
4. PORDATA - Ambiente de Consulta. Available online <https://www.pordata.pt/DB/Portugal/> accessed on 09 July 2021.
